# Supplementary material for: New particle formation and growth during summer in an urban environment: a dual chamber study
Source: Copernicus journal article supplement (doi:10.5194/acp-23-85-2023), 2023-01-04
Supplement: Supplementary file 1 [file acp-23-85-2023-supplement.pdf]

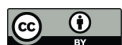

*Supplement of*

## **New particle formation and growth during summer in an urban environment: a dual chamber study**

**Spiro D. Jorga et al.**

*Correspondence to:* Spyros N. Pandis ([spyros@chemeng.upatras.gr](mailto:spyros@chemeng.upatras.gr))

The copyright of individual parts of the supplement might differ from the article licence.

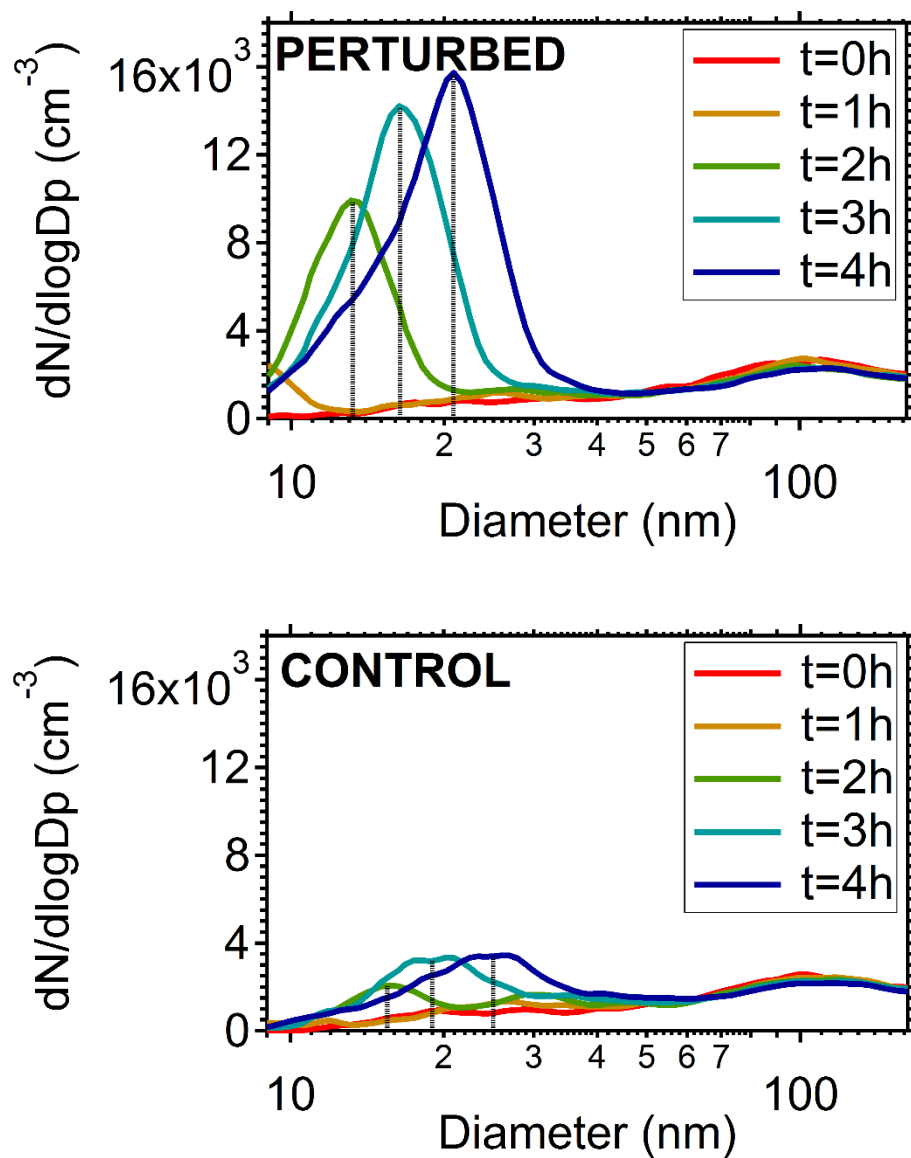

**Figure S1:** Number distributions inside the perturbed (top) and control (bottom) chamber at different times after turning on UV lights ( $t=0$  h) for Exp. B1.

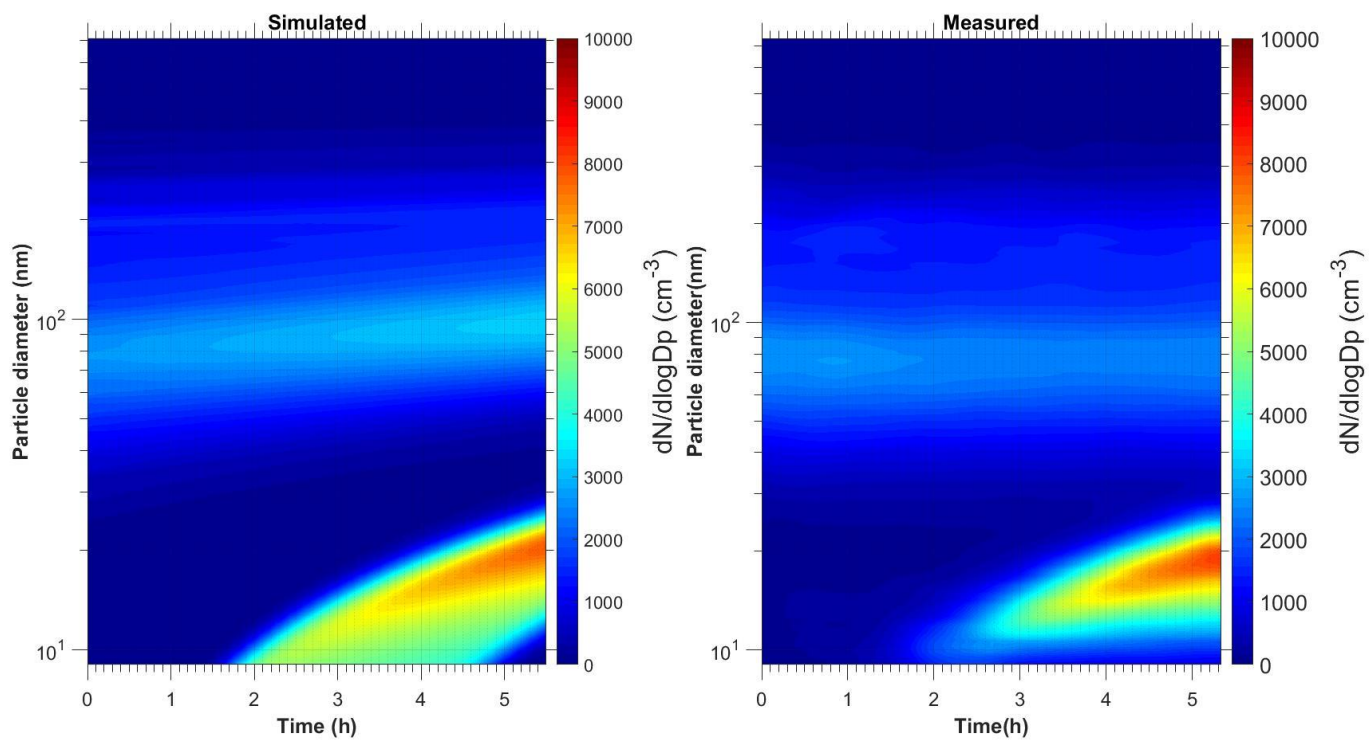

**Figure S2:** Simulated and measured particle number distributions after the UV lights were turned on in the perturbed chamber for Exp. A1.

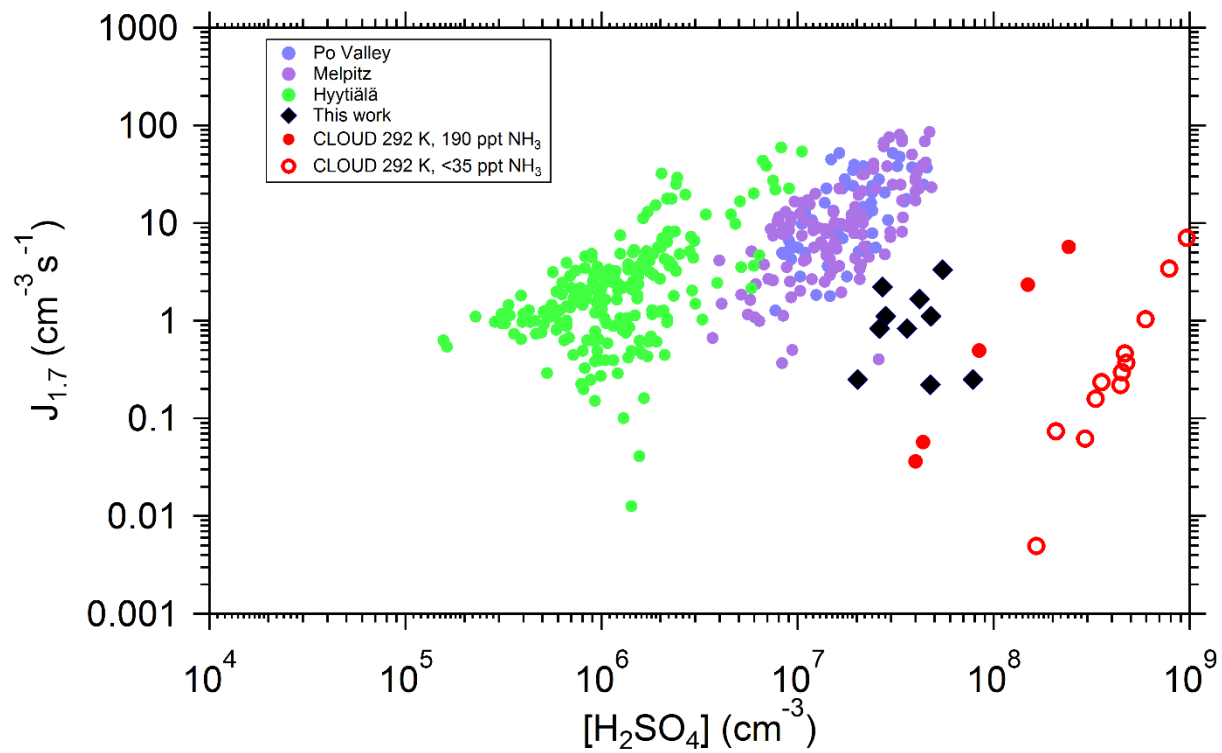

**Figure S3:** Comparison of nucleation rate ( $J_{1.7}$ ) with measurements of ambient observations and with laboratory experiments (CLOUD campaign) as a function of  $[\text{H}_2\text{SO}_4]$  (Kirkby et al. 2011 and references therein).
